# Supplementary material
Source: ML conference proceedings conference paper supplement (https://proceedings.neurips.cc/paper_files/paper/2018/hash/13f9896df61279c928f19721878fac41-Abstract.html)
Supplement: Supplementary file [file 13f9896df61279c928f19721878fac41-Supplemental.zip]

## A Proof of Theorem 3

We will use the following observation.

**Lemma 1.** *Suppose  $X, w_1, \dots, w_n$  are independent real-valued random variables whose distributions are symmetric around 0. Assume also that the distribution of  $X$  has no atoms (i.e.  $\mathbb{P}(X = x) = 0$  for all  $x \in \mathbb{R}$ ), and fix any bounded positive function  $\psi : \mathbb{R} \rightarrow \mathbb{R}_+$  with the property*

$$\psi(t) + \psi(-t) = 1. \quad (18)$$

*Then for any constants  $a_1, \dots, a_n \in \mathbb{R}$  and any non-negative integers  $k_1, \dots, k_n$  whose sum is even, we have*

$$\mathbb{E} \left[ \prod_{j=1}^n w_j^{k_j} \psi \left( X + \sum_j w_j a_j \right) \right] = \frac{1}{2} \prod_{j=1}^n \mathbb{E} \left[ w_j^{k_j} \right].$$

*Proof.* Using that  $X \stackrel{d}{=} -X$ ,  $w_j \stackrel{d}{=} -w_j$  and that  $\sum_j k_j$  is even, we have

$$\mathbb{E} \left[ \prod_{j=1}^n w_j^{k_j} \psi \left( X + \sum_j w_j a_j \right) \right] = \mathbb{E} \left[ \prod_{j=1}^n w_j^{k_j} \psi \left( -(X + \sum_j w_j a_j) \right) \right].$$

Averaging these two expressions we combine (18) with the fact that  $X$  is independent of  $\{w_j\}_{j=1}^n$  and its law has no atoms to obtain the desired result.  $\square$

We now turn to the proof of Theorem 3. To this end, fix  $d \geq 1$ , a collection of positive integers  $\mathbf{n} = (n_i)_{i=0}^d$ , and let  $\mathcal{N} \in \mathfrak{N}_{\mu, \nu}(\mathbf{n}, d)$ . Let us briefly recall the notation for paths from §5.2. Given  $1 \leq p \leq n_0$  and  $1 \leq q \leq n_d$ , we defined a path  $\gamma$  from  $p$  to  $q$  to be a collection  $\{\gamma(j)\}_{j=0}^d$  of neurons so that  $\gamma(0) = p$ ,  $\gamma(d) = q$ , and  $\gamma(j) \in \{1, \dots, n_j\}$ . The numbers  $\gamma(j)$  should be thought of as neurons in the  $j^{\text{th}}$  hidden layer of  $\mathcal{N}$ . Given such a collection, we obtain for each  $j$  a weight

$$w_\gamma^{(j)} := w_{\gamma(j-1), \gamma(j)}^{(j)} \quad (19)$$

between each two consecutive neurons along the path  $\gamma$ . Our starting point is the expression

$$Z_{p,q} = \sum_{\substack{\text{paths } \gamma \\ \text{from } p \text{ to } q}} \prod_{j=1}^d w_\gamma^{(j)} \mathbf{1}_{\{\text{act}_{\gamma(j)}^{(j)} > 0\}}, \quad (20)$$

where  $\text{act}^{(j)}$  are defined as in (10). This expression is well-known and follows immediately from the chain rule (c.f. e.g. equation (1) in [CHM<sup>+</sup>15]). We therefore have

$$Z_{p,q}^{2K} = \sum_{\substack{\text{paths } \gamma_1, \dots, \gamma_{2K} \\ \text{from } p \text{ to } q}} \prod_{j=1}^d \prod_{k=1}^{2K} w_{\gamma_k}^{(j)} \mathbf{1}_{\{\text{act}_{\gamma_k(j)}^{(j)} > 0\}}.$$

We will prove a slightly more general statement than in the formulation of Theorem 3. Namely, suppose  $\Gamma = (\gamma_1, \dots, \gamma_{2K})$  is any collection of paths from the input of  $\mathcal{N}$  to the output (the paths are not required to have the same starting and ending neurons) such that for every  $\beta \in \Gamma(d)$ ,

$$\# \{ \gamma \in \Gamma \mid \gamma(d) = \beta \} \quad \text{is even.}$$

We will show that

$$\mathbb{E} \left[ \prod_{j=1}^d \prod_{k=1}^{2K} w_{\gamma_k}^{(j)} \mathbf{1}_{\{\text{act}_{\gamma_k(j)}^{(j)} > 0\}} \right] = \prod_{j=1}^d \left( \frac{1}{2} \right)^{|\Gamma(j)|} \prod_{\substack{\alpha \in \Gamma(j-1) \\ \beta \in \Gamma(j)}} \mu_{|\Gamma_{\alpha, \beta}^{(j)}|}^{(j)}. \quad (21)$$

To evaluate the expectation in (21), note that the computation done by  $\mathcal{N}$  is a Markov chain with respect to the layers (i.e. given  $\text{Act}^{(j-1)}$ , the activations at layers  $j, \dots, d$  are independent of the weight and biases up to and including layer  $j-1$ .) Hence, denoting by  $\mathcal{F}_{\leq d-1}$  the sigma algebra

generated by the weight and biases up to and including layer  $d - 1$ , the tower property for expectation and the Markov property yield

$$\begin{aligned}
& \mathbb{E} \left[ \prod_{j=1}^d \prod_{k=1}^{2K} w_{\gamma_k}^{(j)} \mathbf{1}_{\{\text{act}_{\gamma_k(j)}^{(j)} > 0\}} \right] \\
&= \mathbb{E} \left[ \prod_{j=1}^{d-1} \prod_{k=1}^{2K} w_{\gamma_k}^{(j)} \mathbf{1}_{\{\text{act}_{\gamma_k(j)}^{(j)} > 0\}} \mathbb{E} \left[ \prod_{k=1}^{2K} w_{\gamma_k}^{(d)} \mathbf{1}_{\{\text{act}_{\gamma_k(d)}^{(d)} > 0\}} \mid \mathcal{F}_{\leq d-1} \right] \right] \\
&= \mathbb{E} \left[ \prod_{j=1}^{d-1} \prod_{k=1}^{2K} w_{\gamma_k}^{(j)} \mathbf{1}_{\{\text{act}_{\gamma_k(j)}^{(j)} > 0\}} \mathbb{E} \left[ \prod_{k=1}^{2K} w_{\gamma_k}^{(d)} \mathbf{1}_{\{\text{act}_{\gamma_k(d)}^{(d)} > 0\}} \mid \text{Act}^{(d-1)} \right] \right]. \quad (22)
\end{aligned}$$

Next, observe that for each  $1 \leq j \leq d$ , conditioned on  $\text{Act}^{(j-1)}$ , the families of random variables  $\{w_{\alpha,\beta}^{(j)}, \text{act}_{\beta}^{(j)}\}_{\alpha=1}^{n_{j-1}}$  are independent for different  $\beta$ . For  $j = d$  this implies

$$\mathbb{E} \left[ \prod_{k=1}^{2K} w_{\gamma_k}^{(d)} \mathbf{1}_{\{\text{act}_{\gamma_k(d)}^{(d)} > 0\}} \mid \text{Act}^{(d-1)} \right] = \prod_{\beta \in \Gamma(d)} \mathbb{E} \left[ \prod_{\substack{k=1 \\ \gamma_k(d)=\beta}}^{2K} w_{\gamma_k}^{(d)} \mathbf{1}_{\{\text{act}_{\gamma_k(d)}^{(d)} > 0\}} \mid \text{Act}^{(d-1)} \right]. \quad (23)$$

Consider the decomposition

$$\text{act}_{\beta}^{(d)} = \text{act}_{\Gamma,\beta}^{(d)} + \widehat{\text{act}}_{\Gamma,\beta}^{(d)}, \quad (24)$$

where

$$\begin{aligned}
\text{act}_{\Gamma,\beta}^{(d)} &:= \sum_{\alpha \in \Gamma(d-1)} \text{Act}_{\alpha}^{(d-1)} w_{\alpha,\beta}^{(d)} \\
\widehat{\text{act}}_{\Gamma,\beta}^{(d)} &= \text{act}_{\beta}^{(d)} - \text{act}_{\Gamma,\beta}^{(d)} = b_{\beta}^{(d)} + \sum_{\alpha \notin \Gamma(d-1)} \text{Act}_{\alpha}^{(d-1)} w_{\alpha,\beta}^{(d)}.
\end{aligned}$$

Let us make several observations about  $\widehat{\text{act}}_{\Gamma,\beta}^{(d)}$  and  $\text{act}_{\Gamma,\beta}^{(d)}$  when conditioned on  $\text{Act}^{(d-1)}$ . First, the conditioned random variable  $\widehat{\text{act}}_{\Gamma,\beta}^{(d-1)}$  is independent of the conditioned random variable  $\text{act}_{\Gamma,\beta}^{(d-1)}$ . Second, the distribution of  $\widehat{\text{act}}_{\Gamma,\beta}^{(d)}$  conditioned on  $\text{Act}^{(d-1)}$  is symmetric around 0. Third, since we assumed that the bias distributions  $\nu^{(j)}$  for  $\mathcal{N}$  have no atoms, the conditional distribution of  $\widehat{\text{act}}_{\Gamma,\beta}^{(d)}$  also has no atoms. Fourth,  $\text{act}_{\Gamma,\beta}^{(d-1)}$  is a linear combination of the weights  $\{w_{\alpha,\beta}^{(d)}\}_{\alpha \in \Gamma(j-1)}$  with given coefficients  $\{\text{Act}_{\alpha}^{(d-1)}\}_{\alpha \in \Gamma(j-1)}$ . Since the weight distributions  $\mu^{(j)}$  for  $\mathcal{N}$  are symmetric around 0, the above five observations, together with (24) allow us to apply Lemma 1 and to conclude that

$$\mathbb{E} \left[ \prod_{k=1}^{2K} w_{\gamma_k}^{(j)} \mathbf{1}_{\{\text{act}_{\gamma_k(d)}^{(d)} > 0\}} \mid \text{Act}^{(d-1)} \right] = \left( \frac{1}{2} \right)^{|\Gamma(d)|} \prod_{\substack{\beta \in \Gamma(d) \\ \alpha \in \Gamma(d-1)}} \mu_{|\Gamma_{\alpha,\beta}^{(d)}|}^{(d)}. \quad (25)$$

Combining this with (22) yields

$$\begin{aligned}
& \mathbb{E} \left[ \prod_{j=1}^d \prod_{k=1}^{2K} w_{\gamma_k}^{(j)} \mathbf{1}_{\{\text{act}_{\gamma_k(j)}^{(j)} > 0\}} \right] \\
&= \mathbb{E} \left[ \prod_{j=1}^{d-1} \prod_{k=1}^{2K} w_{\gamma_k}^{(j)} \mathbf{1}_{\{\text{act}_{\gamma_k(j)}^{(j)} > 0\}} \right] \left( \frac{1}{2} \right)^{|\Gamma(d)|} \prod_{\substack{\beta \in \Gamma(d) \\ \alpha \in \Gamma(d-1)}} \mu_{|\Gamma_{\alpha,\beta}^{(d)}|}^{(d)}.
\end{aligned}$$

To complete the argument, we must consider two cases. First, recall that by assumption, for every  $\beta \in \Gamma(d)$ , the number of  $\gamma \in \Gamma$  for which  $\gamma(d) = \beta$  is even. If for every  $j \leq d$  and each  $\alpha \in \Gamma(j-1)$

the number of  $\gamma \in \Gamma$  passing through  $\alpha$  is even, then we may repeat the preceding argument to directly obtain (21). Otherwise, we apply this argument until we reach  $\alpha \in \Gamma(j-1)$ ,  $\beta \in \Gamma(j)$  so that the number  $|\Gamma_{\alpha,\beta}(j)|$  of paths in  $\Gamma$  that pass through  $\alpha$  and  $\beta$  is odd. In this case, the right hand side of (22) vanishes since the measure  $\mu^{(d)}$  is symmetric around 0 and thus has vanishing odd moments. Relation (21) therefore again holds since in this case both sides are 0. This completes the proof of Theorem 3.  $\square$

## B Proof of Theorem 1

In this section, we use Theorem 3 to prove Theorem 1. Let us first check (11). According to Theorem 3, we have

$$\mathbb{E}[Z_{p,q}^2] = \sum_{\substack{\Gamma=(\gamma_1, \gamma_2) \\ \text{paths from p to q}}} \prod_{j=1}^d \left(\frac{1}{2}\right)^{|\Gamma(j)|} \prod_{\substack{\alpha \in \Gamma(j-1) \\ \beta \in \Gamma(j)}} \mu_{|\Gamma_{\alpha,\beta}(d)|}^{(j)}.$$

Note that since  $\mu$  is symmetric around 0, we have that  $\mu_1 = 0$ . Thus, the terms where  $\gamma_1 \neq \gamma_2$  vanish. Using  $\mu_2^{(j)} = \frac{2}{n_{j-1}}$ , we find

$$\mathbb{E}[Z_{p,q}^2] = \sum_{\substack{\text{paths } \gamma \\ \text{from p to q}}} \prod_{j=1}^d \frac{1}{2} \cdot \frac{2}{n_{j-1}} = \frac{1}{n_0},$$

as claimed. We now turn to proving (12). Using Theorem 3, we have

$$\begin{aligned} \mathbb{E}[Z_{p,q}^4] &= \sum_{\substack{\Gamma=(\gamma_k)_{k=1}^4 \\ \text{paths from p to q}}} \prod_{j=1}^d \left(\frac{1}{2}\right)^{|\Gamma(j)|} \prod_{\substack{\beta \in \Gamma(j) \\ \alpha \in \Gamma(j-1)}} \mu_{|\Gamma_{\alpha,\beta}(j)|}^{(j)} \\ &= \sum_{\substack{\Gamma=(\gamma_k)_{k=1}^4 \\ \text{paths from p to q} \\ |\Gamma_{\alpha,\beta}(j)| \text{ even } \forall \alpha, \beta}} \prod_{j=1}^d \left( \frac{\mu_4^{(j)}}{2} \mathbf{1}_{\left\{ \frac{|\Gamma(j-1)|}{|\Gamma(j)|} = 1 \right\}} + \frac{(\mu_2^{(j)})^2}{2} \mathbf{1}_{\left\{ \frac{|\Gamma(j-1)|}{|\Gamma(j)|} = 2 \right\}} + \frac{(\mu_2^{(j)})^2}{4} \mathbf{1}_{\{|\Gamma(j)|=2\}} \right), \end{aligned}$$

where we have used that  $\mu_1^{(j)} = \mu_3^{(j)} = 0$ . Fix  $\bar{\Gamma} = (\gamma_k)_{k=1}^4$ . Note that  $\bar{\Gamma}$  gives a non-zero contribution to  $\mathbb{E}[Z_{p,q}^4]$  only if

$$|\bar{\Gamma}_{\alpha,\beta}(j)| \text{ is even, } \quad \forall j, \alpha, \beta.$$

For each such  $\bar{\Gamma}$ , we have  $|\bar{\Gamma}(j)| \in \{1, 2\}$  for every  $j$ . Hence, for every  $\bar{\Gamma}$  that contributes a non-zero term in the expression above for  $\mathbb{E}[Z_{p,q}^4]$ , we may find a collection of two paths  $\Gamma = (\gamma_1, \gamma_2)$  from p to q such that

$$\bar{\Gamma}(j) = \Gamma(j), \quad |\bar{\Gamma}_{\alpha,\beta}(j)| = 2 |\Gamma_{\alpha,\beta}(j)|, \quad \forall j, \alpha, \beta.$$

We can thus write  $\mathbb{E}[Z_{p,q}^4]$  as

$$\sum_{\substack{\Gamma=(\gamma_1, \gamma_2) \\ \text{paths from p to q}}} A(\Gamma) \prod_{j=1}^d \left( \frac{\mu_4^{(j)}}{2} \mathbf{1}_{\left\{ \frac{|\Gamma(j-1)|}{|\Gamma(j)|} = 1 \right\}} + \frac{(\mu_2^{(j)})^2}{2} \mathbf{1}_{\left\{ \frac{|\Gamma(j-1)|}{|\Gamma(j)|} = 2 \right\}} + \frac{(\mu_2^{(j)})^2}{4} \mathbf{1}_{\{|\Gamma(j)|=2\}} \right), \quad (26)$$

where we introduced

$$A(\Gamma) := \frac{\# \left\{ \bar{\Gamma} = (\bar{\gamma}_k)_{k=1}^4, \bar{\gamma}_k \text{ path from p to q} \mid \begin{array}{l} \forall j, \alpha, \beta, \Gamma(j) = \bar{\Gamma}(j) \\ 2|\Gamma_{\alpha,\beta}(j)| = |\bar{\Gamma}_{\alpha,\beta}(j)| \end{array} \right\}}{\# \left\{ \bar{\Gamma} = (\bar{\gamma}_k)_{k=1}^4, \bar{\gamma}_k \text{ path from p to q} \mid \begin{array}{l} \forall j, \alpha, \beta, \Gamma(j) = \bar{\Gamma}(j) \\ |\Gamma_{\alpha,\beta}(j)| = |\bar{\Gamma}_{\alpha,\beta}(j)| \end{array} \right\}}, \quad (27)$$

which we now evaluate.

**Lemma 1.** For each  $\Gamma = (\gamma_k)_{k=1}^2$  with  $\gamma_k$  paths from  $p$  to  $q$ , we have

$$A(\Gamma) = 3^{\#\{j \mid |\Gamma(j-1)|=1, |\Gamma(j)|=2\}} = 3^{\#\{j \mid |\Gamma(j-1)|=2, |\Gamma(j)|=1\}}. \quad (28)$$

*Proof.* We begin by checking the first equality in (28) by induction on  $d$ . Fix  $\Gamma = (\gamma_1, \gamma_2)$ . When  $d = 1$ , we have  $|\Gamma(0)| = |\Gamma(1)| = 1$ . Hence  $\gamma_1 = \gamma_2$  and  $A(\Gamma) = 1$  since both the numerator and denominator on the right hand side of (27) equal 1. The right hand side of (28) is also 1 since  $|\Gamma(j)| = 1$  for every  $j$ . This completes the base case. Suppose now that  $D \geq 2$ , and we have proved (28) for all  $d \leq D - 1$ . Let

$$j_* := \min \{j = 1, \dots, d \mid |\Gamma(j)| = 1\}.$$

If  $j_* = 1$ , then we are done by the inductive hypothesis. Otherwise, there are two choices of  $\bar{\Gamma} = \{\bar{\gamma}_k\}_{k=1}^2$  for which

$$\Gamma(j) = \bar{\Gamma}(j), \quad |\Gamma_{\alpha,\beta}(j)| = |\bar{\Gamma}_{\alpha,\beta}(j)|, \quad j \leq j_*.$$

These choices correspond to the two permutations of  $\{\gamma_k\}_{k=1}^2$ . Similarly, there are 6 choices of  $\bar{\Gamma} = \{\bar{\gamma}_k\}_{k=1}^4$  for which

$$\Gamma(j) = \bar{\Gamma}(j), \quad 2|\Gamma_{\alpha,\beta}(j)| = |\bar{\Gamma}_{\alpha,\beta}(j)|, \quad j \leq j_*.$$

The six choices correspond to selecting one of two choices for  $\gamma_1(1)$  and three choices of an index  $k = 2, 3, 4$  so that  $\gamma_k(j)$  coincides with  $\gamma_1(j)$  for each  $j \leq j_*$ . If  $j_* = d$ , we are done. Otherwise, we apply the inductive hypothesis to paths from  $\Gamma(j_*)$  to  $\Gamma(d)$  to complete the proof of the first equality in (28). The second equality in (28) follows from the observation that since  $|\Gamma(0)| = |\Gamma(d)| = 1$ , the number of  $j \in \{1, \dots, d\}$  for which  $|\Gamma(j-1)| = 1$ ,  $|\Gamma(j)| = 2$  must equal the number of  $j$  for which  $|\Gamma(j-1)| = 2$ ,  $|\Gamma(j)| = 1$ .  $\square$

Combining (26) with (28), we may write  $\mathbb{E}[Z_{p,q}^4]$  as

$$\sum_{\substack{\Gamma=(\gamma_1, \gamma_2) \\ \text{paths from } p \text{ to } q}} \prod_{j=1}^d \left[ \frac{\mu_4^{(j)}}{2} \mathbf{1}_{\left\{ \frac{|\Gamma(j-1)|=1}{|\Gamma(j)|=1} \right\}} + \frac{3}{2} \left( \mu_2^{(j)} \right)^2 \mathbf{1}_{\left\{ \frac{|\Gamma(j-1)|=2}{|\Gamma(j)|=1} \right\}} + \frac{\left( \mu_2^{(j)} \right)^2}{4} \mathbf{1}_{\{|\Gamma(j)|=2\}} \right]. \quad (29)$$

Observe that since  $\mu_2^{(j)} = 2/n_{j-1}$ , we have

$$\left( \#\{\Gamma = (\gamma_k)_{k=1}^2 \text{ paths from } p \text{ to } q\} \right)^{-1} = \prod_{j=1}^{d-1} \frac{1}{n_j^2} = n_0^2 \cdot \prod_{j=1}^d \left( \mu_2^{(j)} \right)^2 / 4.$$

Hence,

$$\mathbb{E}[Z_{p,q}^4] = \frac{1}{n_0^2} \mathbb{E}[X_d(\gamma_1, \gamma_2)],$$

where the expectation on the right hand side is over the uniform measure on paths  $(\gamma_1, \gamma_2)$  from the input of  $\mathcal{N}$  to the output conditioned on  $\gamma_1(0) = \gamma_2(0) = p$  and  $\gamma_1(d) = \gamma_2(d) = q$ , and

$$X_d(\gamma_1, \gamma_2) := \prod_{j=1}^d \left( 2\tilde{\mu}_4 \cdot \mathbf{1}_{\left\{ \frac{|\Gamma(j-1)|=1}{|\Gamma(j)|=1} \right\}} + 6 \cdot \mathbf{1}_{\left\{ \frac{|\Gamma(j-1)|=2}{|\Gamma(j)|=1} \right\}} + \mathbf{1}_{\{|\Gamma(j)|=2\}} \right), \quad \Gamma = (\gamma_1, \gamma_2).$$

We now obtain the upper and lower bounds in (12) on  $\mathbb{E}[Z_{p,q}^4]$  in similar ways. In both cases, we use the observation that the number of  $\Gamma = (\gamma_1, \gamma_2)$  for which  $|\Gamma(j)| = 1$  for exactly  $k$  values of  $1 \leq j \leq d-1$  is

$$\prod_{j=1}^{d-1} n_j \cdot \sum_{\substack{I \subseteq \{1, \dots, d-1\} \\ |I|=d-1-k}} \prod_{j \in I} (n_j - 1).$$

The value of  $X_d$  corresponding to every such path is at least  $2^{k+1}$  since  $\tilde{\mu}_4^{(j)} \geq 1$  for every  $j$  and is at most  $6\tilde{\mu}_{4,max}$  for the same reason. Therefore, using that for all  $\varepsilon \in [0, 1]$ , we have

$$\log(1 + \varepsilon) \geq \frac{\varepsilon}{2},$$

we obtain

$$\begin{aligned}
\mathbb{E}[X_d] &\geq \frac{1}{\prod_{j=1}^{d-1} n_j} \sum_{k=0}^{d-1} 2^{k+1} \sum_{\substack{I \subseteq \{1, \dots, d-1\} \\ |I|=d-1-k}} \prod_{j \in I} (n_j - 1) \\
&= 2 \sum_{k=0}^{d-1} \sum_{\substack{I \subseteq \{1, \dots, d-1\} \\ |I|=d-1-k}} \prod_{j \notin I} \left(\frac{2}{n_j}\right) \prod_{j \in I} \left(1 + \frac{1}{n_j}\right) \\
&= 2 \prod_{j=1}^{d-1} \left(1 + \frac{1}{n_j}\right) \geq 2 \exp \left( \frac{1}{2} \sum_{j=1}^{d-1} \frac{1}{n_j} \right).
\end{aligned}$$

This completes the proof of the lower bound. The upper bound is obtained in the same way:

$$\begin{aligned}
\mathbb{E}[X_d] &\leq \frac{1}{\prod_{j=1}^{d-1} n_j} \sum_{k=0}^{d-1} (6\tilde{\mu}_{4,max})^{k+1} \sum_{\substack{I \subseteq \{1, \dots, d-1\} \\ |I|=d-1-k}} \prod_{j \in I} (n_j - 1) \\
&= 6\tilde{\mu}_{4,max} \prod_{j=1}^{d-1} \left(1 + \frac{6\tilde{\mu}_{4,max}}{n_j}\right) \leq 6\tilde{\mu}_{4,max} \exp \left( 6\tilde{\mu}_{4,max} \sum_{j=1}^{d-1} \frac{1}{n_j} \right). \quad (30)
\end{aligned}$$

The upper bounds for  $\mathbb{E}[Z_{p,q}^{2K}]$  for  $K \geq 3$  are obtained in essentially the same way. Namely, we return to the expression for  $\mathbb{E}[Z_{p,q}^{2K}]$  provided by Theorem 3:

$$\mathbb{E}[Z_{p,q}^{2K}] = \sum_{\substack{\Gamma = \{\gamma_k\}_{k=1}^{2K} \\ \gamma_k \text{ paths from } p \text{ to } q}} \prod_{j=1}^d \left(\frac{1}{2}\right)^{|\Gamma(j)|} \prod_{\substack{\beta \in \Gamma(j) \\ \alpha \in \Gamma(j-1)}} \mu_{|\Gamma_{\alpha,\beta}(j)|}^{(j)}.$$

As with the second and fourth moment computations, we note that  $\mu_{|\Gamma_{\alpha,\beta}(j)|}$  vanishes unless each  $|\Gamma_{\alpha,\beta}(j)|$  is even. Hence, as with (29), we may write

$$\mathbb{E}[Z_{p,q}^{2K}] = \sum_{\substack{\Gamma = \{\gamma_k\}_{k=1}^{2K} \\ \gamma_k \text{ paths from } p \text{ to } q}} A_K(\Gamma) \prod_{j=1}^d \left(\frac{1}{2}\right)^{|\Gamma(j)|} \prod_{\substack{\beta \in \Gamma(j) \\ \alpha \in \Gamma(j-1)}} \mu_{2|\Gamma_{\alpha,\beta}(j)|}^{(j)}, \quad (31)$$

where  $A_K(\Gamma)$  is the analog of  $A(\Gamma)$  from (27). The same argument as in Lemma 1 shows that

$$A_K(\Gamma) \leq \left( \frac{(2K)!}{K!} \right)^{\#\{1 \leq j \leq d \mid |\Gamma(j)| < K\}}.$$

Combining this with

$$\left( \#\{\Gamma = (\gamma_k)_{k=1}^K \text{ paths from } p \text{ to } q\} \right)^{-1} = \prod_{j=1}^{d-1} \frac{1}{n_j^K} = n_0^K \cdot \prod_{j=1}^d \left( \mu_2^{(K)} \right)^2 / 2^K,$$

which is precisely the weight in (31) assigned to collections  $\Gamma$  with  $|\Gamma(j)| = K$  for every  $1 \leq j \leq d-1$ , yields

$$\mathbb{E}[Z_{p,q}^{2K}] \leq \frac{1}{n_0^K} \mathbb{E}[X_d(\gamma_1, \dots, \gamma_K) \mid \gamma_k(0) = p, \gamma_k(d) = q],$$

where the expectation is over uniformly chosen collections  $\Gamma = (\gamma_1, \dots, \gamma_K)$  of paths from the input to the output of  $\mathcal{N}$  and

$$X_d(\Gamma) = \prod_{j=1}^d 2^{K-|\Gamma(j)|} \frac{(2K)!}{K!} \prod_{\substack{\alpha \in \Gamma(j-1) \\ \beta \in \Gamma(j) \\ |\Gamma(j)| < K}} \mu_{2|\Gamma_{\alpha,\beta}(j)|}^{(j)}.$$

To complete the proof of the upper bound for  $\mathbb{E}[Z_{p,q}^{2K}]$  we now proceed just as the upper bound for the 4<sup>th</sup> moment computation. That is, given  $K < \min\{n_j\}$ , the number of collections of paths  $\Gamma = (\gamma_k)_{k=1}^K$  which  $|\Gamma(j)| < K$  for exactly  $m$  values of  $j$  is bounded above by

$$\prod_{j=1}^{d-1} n_j^{K-1} \sum_{\substack{I \subseteq \{1, \dots, d-1\} \\ |I|=d-1-m}} \prod_{j \in I} (n_j - K).$$

The value of  $X_d$  on each such collection is at most  $(C_K)^m$ , where  $C_K = 2^{K-1} \frac{(2K)!}{K!}$  is a large but fixed constant. Hence, just as in (30),

$$\mathbb{E}[X_d(\Gamma)] \leq C_K \exp \left( C_K \sum_{j=1}^{d-1} \frac{1}{n_j} \right).$$

This completes the proof of Theorem 1.  $\square$

## C Proof of Theorem 2

We have

$$\widehat{\text{Var}[Z^2]} = \frac{1}{M} \left( 1 - \frac{1}{M} \right) \sum_{m=1}^M Z_{p_m, q_m}^4 - \frac{1}{M^2} \sum_{m_1 \neq m_2} Z_{p_{m_1}, q_{m_1}}^2 Z_{p_{m_2}, q_{m_2}}^2. \quad (32)$$

Fixing  $p, q$  and using that the second sum in the previous line has  $M(M-1)$  terms, we have

$$-\frac{1}{M^2} \sum_{m_1 \neq m_2} Z_{p_{m_1}, q_{m_1}}^2 Z_{p_{m_2}, q_{m_2}}^2 = \frac{1}{M^2} \sum_{m_1 \neq m_2} \left( Z_{p, q}^4 - Z_{p_{m_1}, q_{m_1}}^2 Z_{p_{m_2}, q_{m_2}}^2 \right) + \left( 1 - \frac{1}{M} \right) Z_{p, q}^4.$$

Hence, using that  $\mathbb{E}[Z_{p,q}^4]$  is independent of the particular values of  $p, q$ , we fix some  $p, q$  and write

$$\mathbb{E}[\widehat{\text{Var}[Z^2]}] = \frac{1}{M^2} \sum_{m_1 \neq m_2} \mathbb{E}[Z_{p, q}^4] - \mathbb{E}[Z_{p_{m_1}, q_{m_1}}^2 Z_{p_{m_2}, q_{m_2}}^2]. \quad (33)$$

To estimate the difference in this sum, we use Theorem 3 to obtain

$$\mathbb{E}[Z_{p, q}^4] = \sum_{\substack{\Gamma = (\gamma_k)_{k=1}^4 \\ \gamma_k: p \rightarrow q}} \prod_{j=1}^d \left( \frac{1}{2} \right)^{|\Gamma(j)|} \prod_{\alpha, \beta} \mu_{|\Gamma_{\alpha, \beta}(j)|}^{(j)} = \sum_{\substack{\Gamma = (\gamma_k)_{k=1}^4 \\ \gamma_k: p \rightarrow q}} \prod_{j=1}^d C_j(\Gamma) \quad (34)$$

$$\mathbb{E}[Z_{p_1, q_1}^2 Z_{p_2, q_2}^2] = \sum_{\substack{\bar{\Gamma} = (\bar{\gamma}_k)_{k=1}^4 \\ \gamma_1, \gamma_2: p_1 \rightarrow q_1 \\ \gamma_3, \gamma_4: p_2 \rightarrow q_2}} \prod_{j=1}^d \left( \frac{1}{2} \right)^{|\bar{\Gamma}(j)|} \prod_{\alpha, \beta} \mu_{|\bar{\Gamma}_{\alpha, \beta}(j)|}^{(j)} = \sum_{\substack{\bar{\Gamma} = (\bar{\gamma}_k)_{k=1}^4 \\ \gamma_1, \gamma_2: p_1 \rightarrow q_1 \\ \gamma_3, \gamma_4: p_2 \rightarrow q_2}} \prod_{j=1}^d C_j(\bar{\Gamma}). \quad (35)$$

Note that since the measures  $\mu^{(j)}$  of the weights are symmetric around zero, their odd moments vanish and hence the only non-zero terms in (34) and (35) are those for which

$$|\Gamma(j)|, |\bar{\Gamma}(j)| \in \{1, 2\}, \quad |\Gamma_{\alpha, \beta}(j)|, |\bar{\Gamma}_{\alpha, \beta}(j)| \in \{2, 4\}, \quad \forall j, \alpha, \beta.$$

Further, observe that each path  $\gamma$  from some fixed input neuron to some fixed output vertex is determined uniquely by the sequence of hidden neurons  $\gamma(j) \in \{1, \dots, n_j\}$  through which it passes for  $j = 1, \dots, d-1$ . Therefore, we may identify each collection of paths  $\Gamma = (\gamma_k)_{k=1}^4$  in the sum (34) with a unique collection of paths  $\bar{\Gamma} = (\bar{\gamma}_k)_{k=1}^4$  in (35) by asking that  $\gamma_k(j) = \bar{\gamma}_k(j)$  for each  $k$  and all  $1 \leq j \leq d-1$ . Observe further that under this bijection,

$$j \neq 1, d \quad \Rightarrow \quad C_j(\Gamma) = C_j(\bar{\Gamma}). \quad (36)$$

For  $j = 1, d$ , the terms  $C_j(\Gamma)$  and  $C_j(\bar{\Gamma})$  are related as follows:

$$C_1(\Gamma) = C_1(\bar{\Gamma}) \left( \mathbf{1}_{\{|\Gamma(1)|=2\}} + \tilde{\mu}_4^{(1)} \cdot \mathbf{1}_{\{|\Gamma(1)|=1\}} \right) \quad (37)$$

$$C_d(\Gamma) = C_d(\bar{\Gamma}) \left( \mathbf{1}_{\{|\bar{\Gamma}(d)|=1\}} + 2 \cdot \mathbf{1}_{\left\{ \begin{smallmatrix} |\bar{\Gamma}(d)|=2 \\ |\Gamma(d-1)|=2 \end{smallmatrix} \right\}} + 2\tilde{\mu}_4^{(d)} \cdot \mathbf{1}_{\left\{ \begin{smallmatrix} |\bar{\Gamma}(d)|=2 \\ |\Gamma(d-1)|=1 \end{smallmatrix} \right\}} \right). \quad (38)$$

We consider two cases: (i)  $q_{m_1} \neq q_{m_2}$  (i.e.  $|\bar{\Gamma}(d)| = 2$ ) and (ii)  $q_{m_1} = q_{m_2}$  (i.e.  $|\bar{\Gamma}(d)| = 1$  and  $p_{m_1} \neq p_{m_2}$ ). In case (i), we have

$$C_1(\Gamma) = C_1(\bar{\Gamma}) \left( \mathbf{1}_{\{|\Gamma(1)|=2\}} + \tilde{\mu}_4^{(1)} \mathbf{1}_{\{|\Gamma(1)|=1\}} \right) \geq C_1(\bar{\Gamma}) \quad \text{and} \quad C_d(\Gamma) \geq 2C_d(\bar{\Gamma}).$$

Hence, using (37) and (38), we find that in case (i)

$$q_{m_1} \neq q_{m_2} \quad \Rightarrow \quad \mathbb{E} [Z_{p_m, q_m}^4] \geq 2\mathbb{E} [Z_{p_{m_1}, q_{m_1}}^2 Z_{p_{m_2}, q_{m_2}}^2].$$

In case (i) we therefore find

$$\mathbb{E} [Z_{p_m, q_m}^4] - \mathbb{E} [Z_{p_{m_1}, q_{m_1}}^2] \geq \mathbb{E} [Z_{p_{m_1}, q_{m_1}}^2] \geq \frac{1}{n_0^2} \exp \left( \frac{1}{2} \sum_{j=1}^{d-1} \frac{1}{n_j} \right), \quad (39)$$

where the last estimate is proved by the same argument as the relation (12) in Theorem 1. To obtain the analogous lower bound for case (ii), we write  $q = q_{m_1} = q_{m_2}$ ,  $p_{m_1} \neq p_{m_2}$ . In this case, combining (36) with (38), we have

$$C_j(\Gamma) = C_j(\bar{\Gamma}) \quad j = 2, \dots, d.$$

Moreover, continuing to use the bijection between  $\Gamma$  and  $\bar{\Gamma}$  above, (37) yields in this case

$$C_1(\bar{\Gamma}) = \begin{cases} \frac{1}{\tilde{\mu}_4^{(1)}} C_1(\Gamma) & , \quad \text{if } |\Gamma(1)| = 1 \\ 0 & , \quad \text{if } |\Gamma(1)| = 2 \end{cases}.$$

Hence,  $\mathbb{E} [Z_{p, q}^4] - \mathbb{E} [Z_{p_1, q}^2 Z_{p_2, q}^2]$  becomes

$$\sum_{\substack{\Gamma=(\gamma_k)_{k=1}^4 \\ \gamma_k: p \rightarrow q}} (C_1(\Gamma) - C_1(\bar{\Gamma})) \prod_{j=2}^d C_j(\Gamma) = \left( 1 - \frac{1}{\tilde{\mu}_4^{(1)}} \right) \sum_{\substack{\Gamma=(\gamma_k)_{k=1}^4 \\ \gamma_k: p \rightarrow q \\ |\Gamma(1)|=1}} \prod_{j=1}^d C_j(\Gamma).$$

Using that if  $|\Gamma(0)| = |\Gamma(1)| = 1$ , then

$$C_1(\Gamma) = \frac{\mu_4^{(1)}}{2} = \frac{2\tilde{\mu}_4^{(1)}}{n_0^2},$$

we find

$$\mathbb{E} [Z_{p, q}^4] - \mathbb{E} [Z_{p_1, q}^2 Z_{p_2, q}^2] = \frac{2}{n_0^2} \left( \tilde{\mu}_4^{(1)} - 1 \right) \sum_{\substack{\Gamma=(\gamma_k)_{k=1}^4 \\ \gamma_k: p \rightarrow q \\ |\Gamma(1)|=1}} \prod_{j=2}^d C_j(\Gamma). \quad (40)$$

Writing  $\hat{p}$  for any neuron in the first hidden layer of  $\mathcal{N}$ , we rewrite the sum in the previous line as

$$\sum_{\substack{\Gamma=(\gamma_k)_{k=1}^4 \\ \gamma_k: \hat{p} \rightarrow q \\ |\Gamma(1)|=1}} \prod_{j=2}^d C_j(\Gamma) = n_1 \sum_{\substack{\Gamma=(\gamma_k)_{k=1}^4 \\ \gamma_k: \hat{p} \rightarrow q}} \prod_{j=2}^d C_j(\Gamma) = n_1 \mathbb{E} [Z_{\hat{p}, q}^4],$$

where the point is now that we are considering paths only from  $\hat{p}$  to  $q$ . According to (12) from Theorem 1, we have

$$\mathbb{E} [Z_{\hat{p}, q}^4] \geq \frac{2}{n_1^2} \exp \left( \frac{1}{2} \sum_{j=2}^{d-1} \frac{1}{n_j} \right).$$

Combining this with (40) yields

$$\mathbb{E} [Z_{p,q}^4] - \mathbb{E} [Z_{p_1,q}^2 Z_{p_2,q}^2] \geq \frac{4}{n_0^2 n_1} \left( \tilde{\mu}_4^{(1)} - 1 \right) \exp \left( \frac{1}{2} \sum_{j=2}^{d-1} \frac{1}{n_j} \right).$$

Combining this with (33), (39) and setting

$$\eta := \frac{\# \{m_1 \neq m_2 \mid q_{m_1} = q_{m_2}\}}{M(M-1)} = \frac{(n_0 - 1)n_0 n_d}{n_0 n_d (n_0 n_d - 1)} = \frac{n_0 - 1}{n_0 n_d - 1},$$

we obtain

$$\mathbb{E} [\widehat{\text{Var}}[Z^2]] \geq \frac{1}{n_0^2} \left( 1 - \frac{1}{M} \right) \left( \eta + \frac{4(1-\eta)}{n_1} \left( \tilde{\mu}_4^{(1)} - 1 \right) e^{-\frac{1}{n_1}} \right) \exp \left( \frac{1}{2} \sum_{j=1}^{d-1} \frac{1}{n_j} \right),$$

proving (15). Finally, the upper bound in (14) follows from dropping the negative term in (33) and applying the upper bound from (12).  $\square$
